# Supplementary material for: Combined Analysis of the Aberrant Epigenetic Alteration of Pancreatic Ductal Adenocarcinoma
Source: Hindawi journal article supplement (doi:10.1155/2019/9379864), 2019-12-28
Supplement: f1 [file 9379864.f1.pdf]

Supplementary Table 1: Identifying methylation driven cancer genes in PDAC.

| gene          | normalMean | TumorMean | logFC    | pValue   | adjustP  | cor      | corPavalue |
|---------------|------------|-----------|----------|----------|----------|----------|------------|
| ADCYAP1       | 0.112865   | 0.268029  | 1.247792 | 4.43E-07 | 0.000171 | -0.34712 | 2.06E-06   |
| CHAT          | 0.179846   | 0.305369  | 0.763791 | 6.94E-07 | 0.000268 | -0.31901 | 1.42E-05   |
| TRIM58        | 0.12391    | 0.32373   | 1.385493 | 1.02E-06 | 0.000392 | -0.4638  | 7.03E-11   |
| ABCC9         | 0.302053   | 0.412768  | 0.45053  | 1.26E-06 | 0.000485 | -0.48841 | 4.65E-12   |
| SOX17         | 0.169685   | 0.377733  | 1.154511 | 2.41E-06 | 0.000932 | -0.43018 | 2.06E-09   |
| ZNF257        | 0.091935   | 0.236028  | 1.360268 | 2.56E-06 | 0.000988 | -0.52099 | 8.97E-14   |
| ZNF382        | 0.077315   | 0.28135   | 1.863547 | 2.96E-06 | 0.001143 | -0.55356 | 1.11E-15   |
| ZNF730        | 0.06397    | 0.224437  | 1.810845 | 3.09E-06 | 0.001194 | -0.40968 | 1.36E-08   |
| KCNJ8         | 0.155232   | 0.291815  | 0.910634 | 3.63E-06 | 0.001401 | -0.41293 | 1.02E-08   |
| TPTEP1        | 0.269209   | 0.384339  | 0.513652 | 4.07E-06 | 0.001571 | -0.38441 | 1.17E-07   |
| FOXI2         | 0.184259   | 0.373064  | 1.017687 | 4.07E-06 | 0.001571 | -0.33473 | 4.95E-06   |
| NKAPL         | 0.342089   | 0.460865  | 0.429971 | 4.83E-06 | 0.001866 | -0.4     | 3.17E-08   |
| ZSCAN1        | 0.274006   | 0.40699   | 0.570787 | 4.90E-06 | 0.001893 | -0.36757 | 4.48E-07   |
| SHE           | 0.343212   | 0.429225  | 0.322632 | 4.97E-06 | 0.00192  | -0.48088 | 1.09E-11   |
| LINC01197     | 0.347562   | 0.456013  | 0.391804 | 5.26E-06 | 0.002032 | -0.44405 | 5.35E-10   |
| CTD-2368P22.1 | 0.057404   | 0.159913  | 1.478056 | 5.42E-06 | 0.002091 | -0.38132 | 1.51E-07   |
| ZSCAN23       | 0.102916   | 0.202051  | 0.973251 | 5.73E-06 | 0.002212 | -0.5081  | 4.49E-13   |
| TMEM196       | 0.257568   | 0.408826  | 0.666533 | 5.90E-06 | 0.002276 | -0.33145 | 6.20E-06   |
| ZNF492        | 0.061905   | 0.211811  | 1.774659 | 6.24E-06 | 0.002408 | -0.50853 | 4.27E-13   |
| GJD2          | 0.27374    | 0.433708  | 0.663918 | 6.42E-06 | 0.002477 | -0.35143 | 1.51E-06   |
| KDR           | 0.163614   | 0.260843  | 0.672885 | 6.60E-06 | 0.002548 | -0.39763 | 3.88E-08   |
| KCNA3         | 0.320998   | 0.483295  | 0.590341 | 6.98E-06 | 0.002695 | -0.50703 | 5.13E-13   |
| BX470102.3    | 0.32381    | 0.203769  | -0.66821 | 7.38E-06 | 0.00285  | -0.44025 | 7.78E-10   |
| PSMG3         | 0.350581   | 0.237299  | -0.56304 | 7.59E-06 | 0.002931 | -0.45861 | 1.21E-10   |
| ZNF728        | 0.105199   | 0.269407  | 1.356664 | 7.59E-06 | 0.002931 | -0.34545 | 2.33E-06   |
| ZNF518B       | 0.310312   | 0.444683  | 0.519055 | 7.81E-06 | 0.003014 | -0.65476 | 3.65E-23   |
| CTD-2089N3.2  | 0.120879   | 0.312336  | 1.369535 | 8.03E-06 | 0.0031   | -0.36058 | 7.65E-07   |

|               |          |          |          |          |          |          |          |
|---------------|----------|----------|----------|----------|----------|----------|----------|
| ZNF578        | 0.23309  | 0.380361 | 0.706481 | 8.73E-06 | 0.00337  | -0.41414 | 9.11E-09 |
| IRX2          | 0.327397 | 0.458801 | 0.48683  | 9.23E-06 | 0.003562 | -0.45585 | 1.62E-10 |
| CTD-2298J14.2 | 0.08524  | 0.205151 | 1.267094 | 9.75E-06 | 0.003765 | -0.40271 | 2.51E-08 |
| ZNF208        | 0.229628 | 0.370305 | 0.689415 | 1.00E-05 | 0.00387  | -0.5121  | 2.75E-13 |
| SNAP91        | 0.15278  | 0.317379 | 1.054756 | 1.03E-05 | 0.003979 | -0.36339 | 6.18E-07 |
| RP11-21C4.1   | 0.15228  | 0.283519 | 0.896715 | 1.12E-05 | 0.004321 | -0.3674  | 4.54E-07 |
| ZNF454        | 0.161489 | 0.319138 | 0.982745 | 1.15E-05 | 0.004441 | -0.65384 | 4.41E-23 |
| AF186192.1    | 0.130348 | 0.313501 | 1.266098 | 1.18E-05 | 0.004565 | -0.45606 | 1.58E-10 |
| MOGAT2        | 0.462807 | 0.348343 | -0.4099  | 1.51E-05 | 0.005834 | -0.35091 | 1.57E-06 |
| PABPC5        | 0.260792 | 0.493929 | 0.921405 | 1.55E-05 | 0.005994 | -0.50261 | 8.76E-13 |
| CNRIP1        | 0.204353 | 0.335082 | 0.713447 | 1.64E-05 | 0.006327 | -0.43367 | 1.48E-09 |
| ZSCAN18       | 0.308259 | 0.419568 | 0.44476  | 1.64E-05 | 0.006327 | -0.56888 | 1.19E-16 |
| FITM1         | 0.444177 | 0.575615 | 0.373971 | 1.68E-05 | 0.0065   | -0.55081 | 1.64E-15 |
| DOCK8         | 0.672113 | 0.804547 | 0.259473 | 1.68E-05 | 0.0065   | -0.50951 | 3.78E-13 |
| PCDH17        | 0.287294 | 0.388388 | 0.434969 | 1.73E-05 | 0.006678 | -0.44268 | 6.13E-10 |
| CELA3B        | 0.532732 | 0.701517 | 0.397068 | 1.78E-05 | 0.00686  | -0.59381 | 2.42E-18 |
| ID4           | 0.087056 | 0.200525 | 1.203774 | 1.78E-05 | 0.00686  | -0.52716 | 4.05E-14 |
| ZNF418        | 0.201325 | 0.341689 | 0.763159 | 1.83E-05 | 0.007047 | -0.70179 | 1.02E-27 |
| S100A16       | 0.71221  | 0.566845 | -0.32935 | 1.88E-05 | 0.007239 | -0.58711 | 7.12E-18 |
| PTGDR         | 0.246552 | 0.361059 | 0.550347 | 1.93E-05 | 0.007436 | -0.32526 | 9.42E-06 |
| EDNRB         | 0.214877 | 0.343524 | 0.676903 | 1.93E-05 | 0.007436 | -0.45724 | 1.40E-10 |
| ZNF702P       | 0.164447 | 0.243464 | 0.566084 | 1.98E-05 | 0.007637 | -0.45387 | 1.98E-10 |
| GYPC          | 0.251714 | 0.359443 | 0.513975 | 1.98E-05 | 0.007637 | -0.59834 | 1.15E-18 |
| NOL4          | 0.208533 | 0.293877 | 0.494935 | 1.98E-05 | 0.007638 | -0.3425  | 2.87E-06 |
| SFN           | 0.726957 | 0.543613 | -0.41929 | 2.09E-05 | 0.008057 | -0.54358 | 4.49E-15 |
| RP5-1142J19.1 | 0.460692 | 0.310145 | -0.57086 | 2.32E-05 | 0.008962 | -0.40129 | 2.84E-08 |
| GRIA2         | 0.232955 | 0.363083 | 0.640248 | 2.38E-05 | 0.009203 | -0.39723 | 4.02E-08 |
| CD01          | 0.25361  | 0.372026 | 0.552789 | 2.42E-05 | 0.009326 | -0.3844  | 1.17E-07 |
| CBLN4         | 0.257805 | 0.383099 | 0.571435 | 2.45E-05 | 0.009451 | -0.37188 | 3.20E-07 |
| TMEM234       | 0.429244 | 0.31844  | -0.43078 | 2.94E-05 | 0.011366 | -0.36435 | 5.74E-07 |
| MIR200A       | 0.633701 | 0.492496 | -0.36369 | 3.02E-05 | 0.011668 | -0.32502 | 9.57E-06 |
| RP11-760D2.5  | 0.291483 | 0.471652 | 0.694314 | 3.02E-05 | 0.011669 | -0.44159 | 6.83E-10 |
| ZNF471        | 0.116317 | 0.297197 | 1.353357 | 3.27E-05 | 0.012621 | -0.50641 | 5.52E-13 |
| C11orf53      | 0.652834 | 0.536969 | -0.28188 | 3.44E-05 | 0.013297 | -0.51156 | 2.94E-13 |
| CTB-41I6.1    | 0.28347  | 0.4116   | 0.538047 | 3.54E-05 | 0.013648 | -0.42919 | 2.26E-09 |
| RP11-748H22.1 | 0.220534 | 0.367601 | 0.737143 | 3.68E-05 | 0.01419  | -0.40353 | 2.34E-08 |
| TM6SF1        | 0.196485 | 0.341937 | 0.799313 | 4.13E-05 | 0.015943 | -0.32377 | 1.04E-05 |
| ZNF85         | 0.12224  | 0.216208 | 0.822704 | 4.24E-05 | 0.01636  | -0.53749 | 1.03E-14 |
| CUZD1         | 0.668302 | 0.812044 | 0.281058 | 4.46E-05 | 0.017224 | -0.69523 | 4.96E-27 |
| HMGCLL1       | 0.214986 | 0.353255 | 0.716471 | 4.46E-05 | 0.017224 | -0.40395 | 2.25E-08 |
| PPP1R14D      | 0.547627 | 0.444988 | -0.29943 | 4.58E-05 | 0.017672 | -0.47341 | 2.50E-11 |
| SLIT2         | 0.262294 | 0.340397 | 0.376034 | 4.70E-05 | 0.018131 | -0.39791 | 3.79E-08 |
| LIPH          | 0.565237 | 0.455834 | -0.31035 | 4.70E-05 | 0.018131 | -0.55576 | 8.13E-16 |
| AP000251.3    | 0.045693 | 0.144137 | 1.657406 | 5.07E-05 | 0.019578 | -0.36094 | 7.44E-07 |

|               |          |          |          |          |          |          |          |
|---------------|----------|----------|----------|----------|----------|----------|----------|
| GDPD3         | 0.596104 | 0.490846 | -0.28029 | 5.34E-05 | 0.020602 | -0.36524 | 5.36E-07 |
| CTD-2330K9.2  | 0.751258 | 0.563838 | -0.41403 | 5.34E-05 | 0.020602 | -0.37473 | 2.56E-07 |
| AC004009.3    | 0.530847 | 0.334725 | -0.66532 | 5.76E-05 | 0.022235 | -0.47271 | 2.69E-11 |
| BHLHE22       | 0.127556 | 0.219774 | 0.784894 | 5.91E-05 | 0.022805 | -0.3332  | 5.50E-06 |
| LAMA3         | 0.368665 | 0.313096 | -0.23571 | 5.91E-05 | 0.022805 | -0.32347 | 1.06E-05 |
| TBX18         | 0.141154 | 0.2758   | 0.966355 | 5.98E-05 | 0.023096 | -0.39238 | 6.06E-08 |
| PHYHIPL       | 0.143839 | 0.244314 | 0.76428  | 6.06E-05 | 0.02339  | -0.34618 | 2.21E-06 |
| CTD-2554C21.2 | 0.258129 | 0.406858 | 0.65643  | 7.23E-05 | 0.027898 | -0.55153 | 1.48E-15 |
| LINC00675     | 0.761384 | 0.651446 | -0.22498 | 7.60E-05 | 0.02933  | -0.61417 | 7.74E-20 |
| FUT1          | 0.341635 | 0.458052 | 0.423058 | 7.69E-05 | 0.029698 | -0.44229 | 6.37E-10 |
| AC083900.1    | 0.88682  | 0.779764 | -0.1856  | 7.79E-05 | 0.030071 | -0.32395 | 1.03E-05 |
| FBXW12        | 0.444273 | 0.572056 | 0.364709 | 7.79E-05 | 0.030071 | -0.65438 | 3.95E-23 |
| ITGA4         | 0.332801 | 0.462757 | 0.475595 | 7.79E-05 | 0.030072 | -0.46986 | 3.67E-11 |
| CCDC8         | 0.321361 | 0.419157 | 0.383293 | 8.39E-05 | 0.032405 | -0.50923 | 3.91E-13 |
| PAX6          | 0.180263 | 0.291337 | 0.692588 | 8.82E-05 | 0.034054 | -0.36111 | 7.34E-07 |
| AC005498.3    | 0.061349 | 0.212491 | 1.792288 | 9.16E-05 | 0.035342 | -0.34268 | 2.84E-06 |
| RP11-734K21.5 | 0.671682 | 0.502106 | -0.41979 | 9.27E-05 | 0.035782 | -0.38518 | 1.10E-07 |
| C19orf33      | 0.453114 | 0.333937 | -0.4403  | 9.27E-05 | 0.035782 | -0.56643 | 1.71E-16 |
| CHST2         | 0.293002 | 0.368273 | 0.329866 | 9.50E-05 | 0.036677 | -0.32536 | 9.36E-06 |
| ZNF582        | 0.102169 | 0.233333 | 1.191432 | 9.74E-05 | 0.037593 | -0.52485 | 5.46E-14 |
| SFRP2         | 0.284453 | 0.386057 | 0.440623 | 0.000121 | 0.046867 | -0.33111 | 6.35E-06 |
| MARVELD1      | 0.40787  | 0.30897  | -0.40064 | 0.000124 | 0.04802  | -0.57445 | 5.12E-17 |
| VSIG2         | 0.638975 | 0.52554  | -0.28196 | 0.000127 | 0.049202 | -0.64681 | 1.79E-22 |
| TLL1          | 0.1738   | 0.252424 | 0.53842  | 0.000127 | 0.049202 | -0.37648 | 2.23E-07 |

---
